# Supplementary material for: A synergistic chemodynamic–photodynamic-photothermal therapy platform based on biodegradable Ce-doped MoOxnanoparticles
Source: Royal Society of Chemistry journal article supplement (doi:10.1039/d2nr03479d), 2022-01-01
Supplement: d2nr03479d1.pdf [file d2nr03479d1.pdf]

## Supporting Information

# A Synergistic Chemodynamic-Photodynamic-Photothermal Therapy Platform Based on Biodegradable Ce-doped MoO<sub>x</sub> Nanoparticles

Danyang Li,<sup>a</sup> Enna Ha,<sup>\*a</sup> Jingge Zhang,<sup>a</sup> Luyang Wang<sup>b</sup> and Junqing Hu<sup>\*a,c</sup>

<sup>a</sup> College of Health Science and Environmental Engineering, Shenzhen Technology University, Shenzhen 518118, P. R. China.

<sup>b</sup> College of New Materials and New Energies, Shenzhen Technology University, Shenzhen 518118, P. R. China

<sup>c</sup> Shenzhen Bay Laboratory, Shenzhen, 518132, P. R. China

\* Corresponding author E-mail address: [haenna@sztu.edu.cn](mailto:haenna@sztu.edu.cn); [hujunqing@sztu.edu.cn](mailto:hujunqing@sztu.edu.cn)

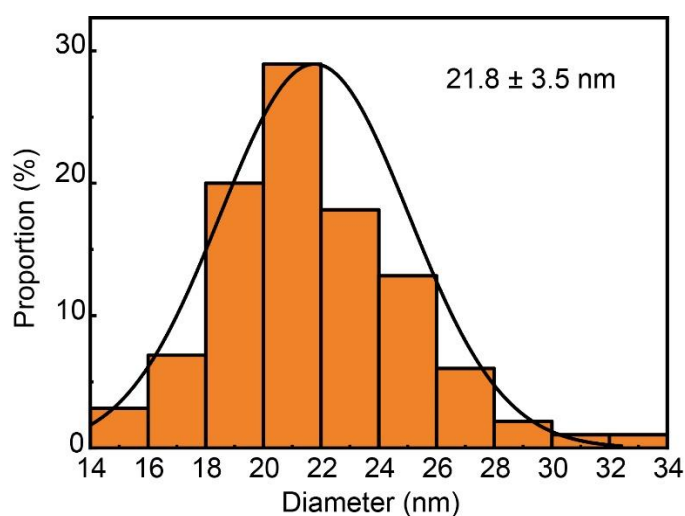

**Figure S1.** Size distribution profile of the CMO calculated from TEM.

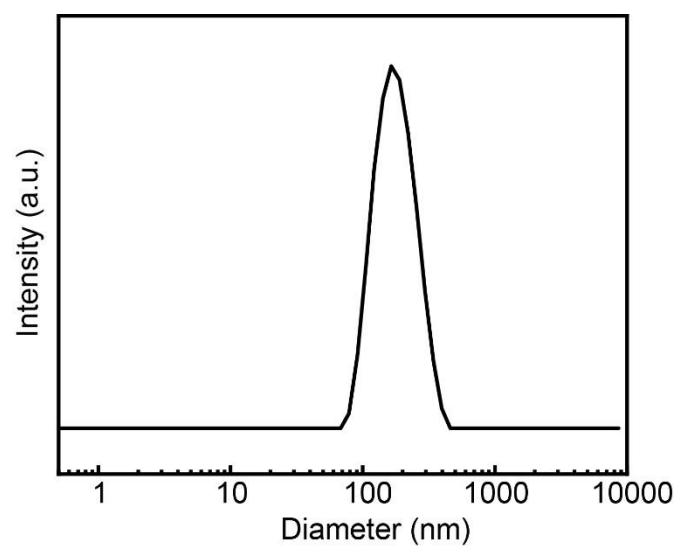

**Figure S2.** Dynamic light scattering diameter distribution of CMO in aqueous solution.

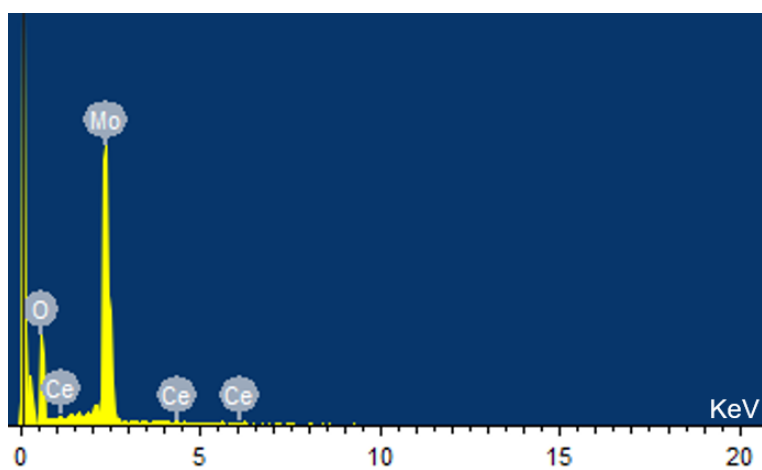

**Figure S3.** EDS spectrum of the CMO.

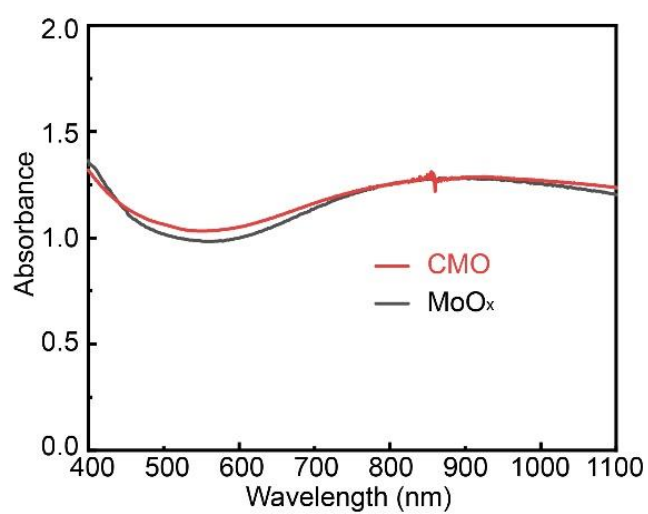

**Figure S4.** UV-Vis-NIR absorbance spectra of the CMO and MoO<sub>x</sub> aqueous solution at the same particle concentration (200 ppm).

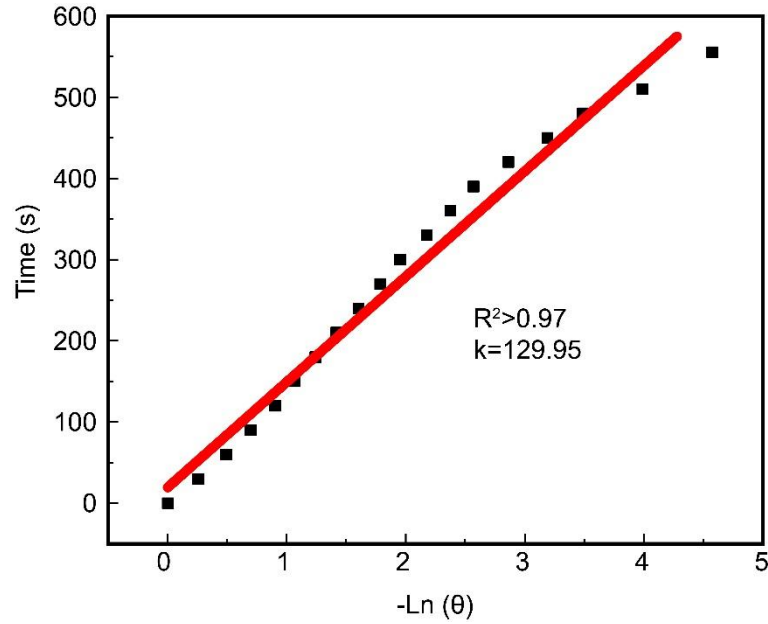

**Figure S5.** Fitting plots of time versus  $-\ln \theta$  during the cooling period.

The photothermal conversion efficiency ( $\eta$ ) indicates the performance of nanomaterials in converting the light into heat. The  $\eta$  value was calculated by the following equation (1):

$$\eta = \frac{hA(T_{max} - T_0) - Q_0}{I(1 - 10^{-A_\lambda})} \times 100\% \quad (1)$$

$\eta$ : the photothermal conversion efficiency;

$h$  (mV/(m<sup>2</sup> °C)): the heat-transfer coefficient;

$A$  (m<sup>2</sup>): the container's surface area;

$T_{max}$  (°C): laser-irradiated maximum temperature;

$T_0$  (°C): the initial temperature;

$Q_0$  (mW): the heat energy caused by the light absorbing of the solvent can be calculated by the process:

$$Q_0 = hA(T_{water,max} - T_0);$$

$T_{water,max}$  (°C): laser-irradiated maximum temperature for DI water;

$I$ : the laser power;

$A_\lambda$ : the absorbance of photothermal agent.

The value of  $hA$  can be calculated by the following equation (2):

$$hA = \frac{m_s c_s}{k} \quad (2)$$

$m_s$  (g): the mass of the sample solution;

$C_s$  (J/(g K)): the sample heat capacity.

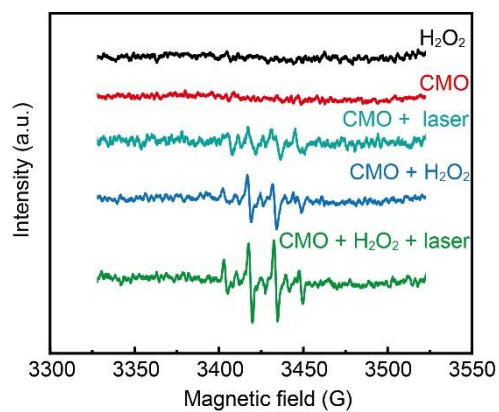

**Figure S6.** ESR spectra of different groups using DMPO as a trapping agent.

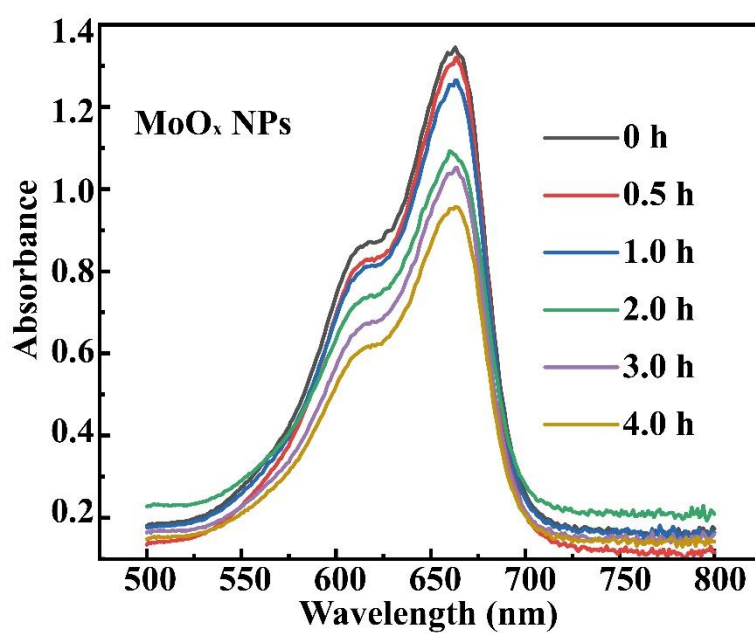

**Figure S7.** Degradation of MB in the MoO<sub>x</sub> aqueous solution at different time points (0 h, 0.5 h, 1 h, 2 h, 3 h, 4 h).

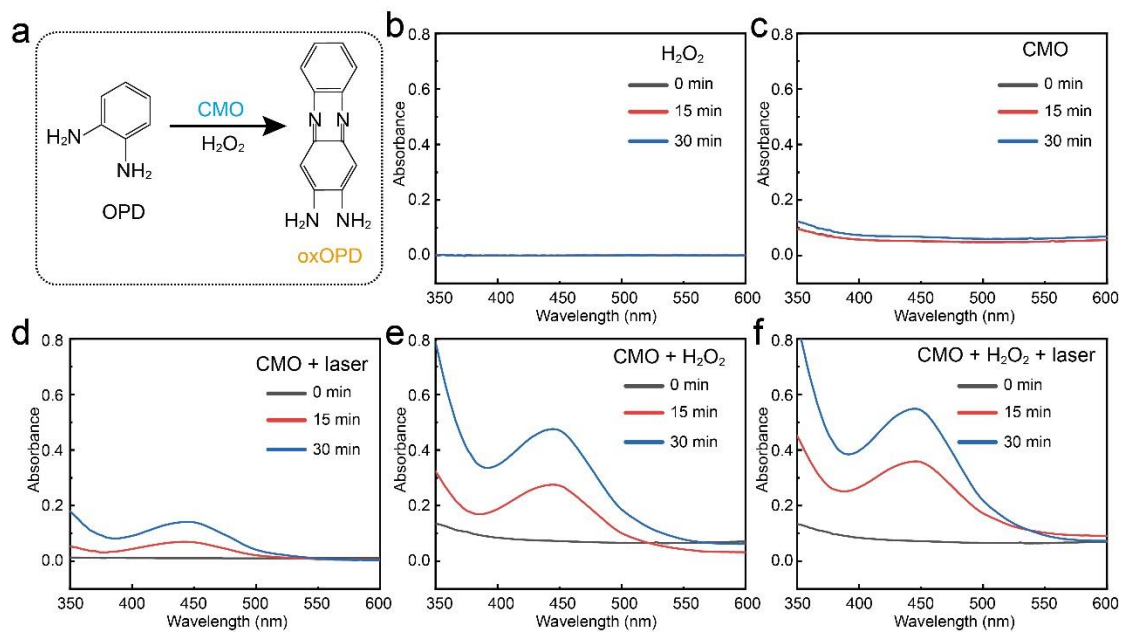

**Figure S8.** Detection of hydroxyl radicals with OPD. (a) Schematic illustration of the generation of  $\cdot\text{OH}$  by CMO, UV-Vis absorption spectra of the following samples: (b) H<sub>2</sub>O<sub>2</sub>, (c) CMO, (d) CMO+laser, (e) CMO+H<sub>2</sub>O<sub>2</sub>, (f) CMO+H<sub>2</sub>O<sub>2</sub>+laser.

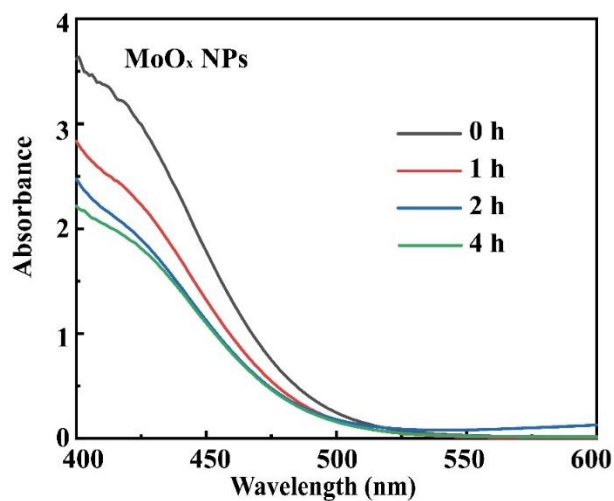

**Figure S9.** Changes of GSH consumption after oxidation with the MoO<sub>x</sub> NPs at different time points (0 h, 1 h, 2 h, 4 h).

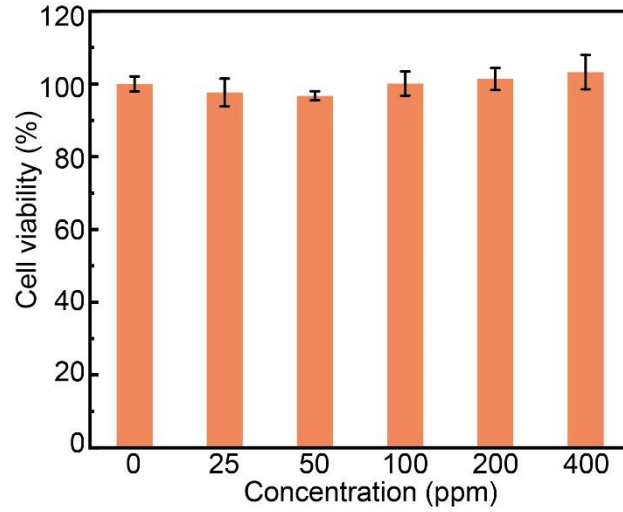

**Figure S10.** Cell viability of HAEC cells after 24 h of incubation with different concentrations of CMO.

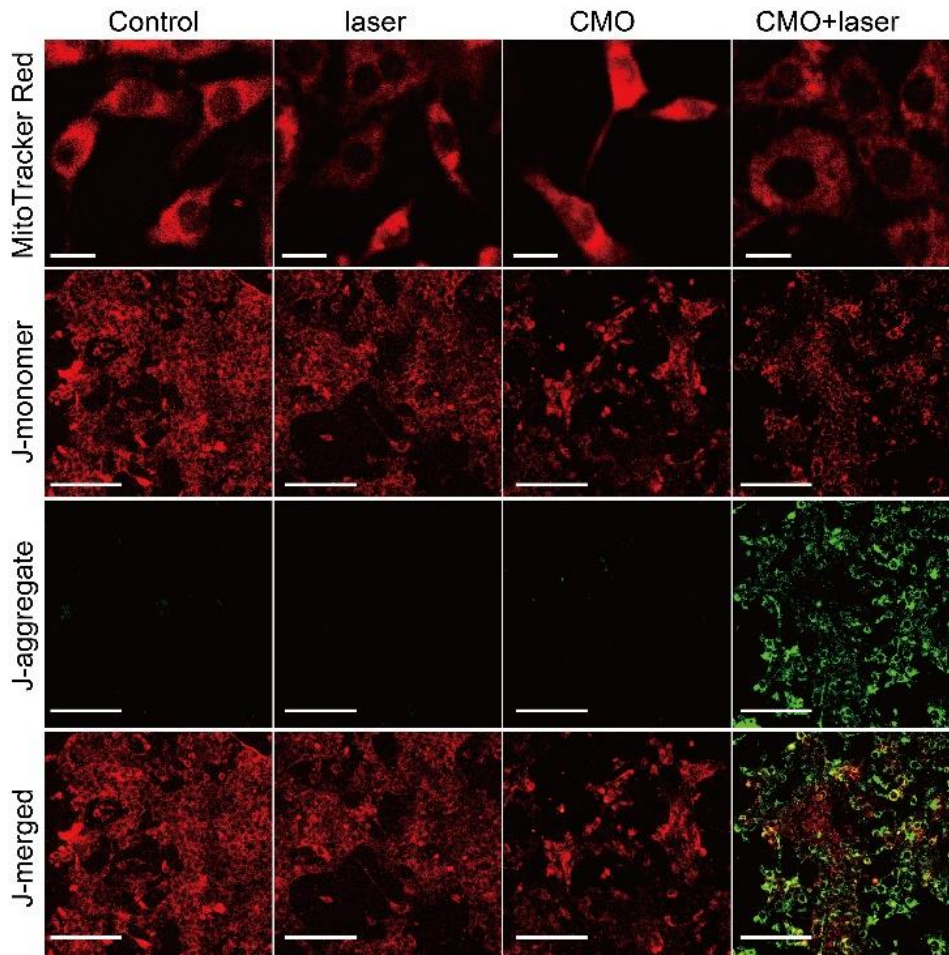

**Figure S11.** CLSM images of mitochondrial morphology (scale bar: 20  $\mu\text{m}$ ) in 4T1 cells after incubation with the CMO and effect of the CMO on mitochondrial membrane potential ( $\Delta\psi\text{m}$ ) in 4T1 cells (scale bar: 200  $\mu\text{m}$ ).

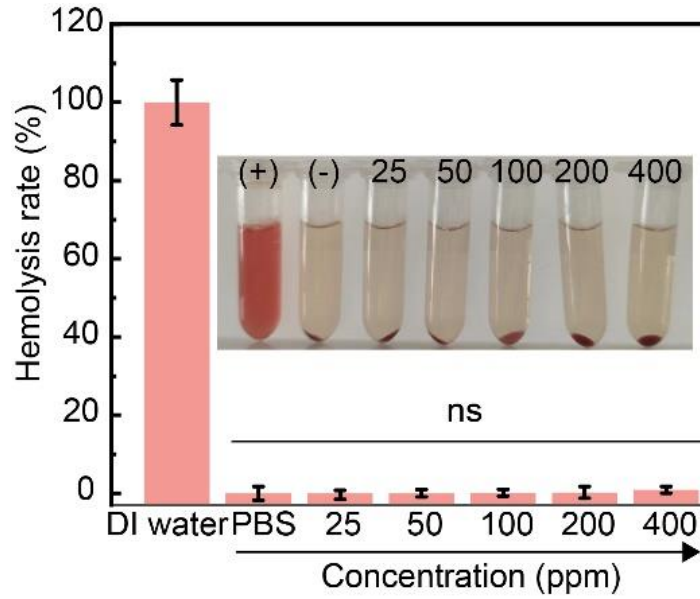

**Figure S12.** Hemolysis analysis of blood incubated with water (positive control) and different concentrations of CMO (inset is corresponding digital photograph).

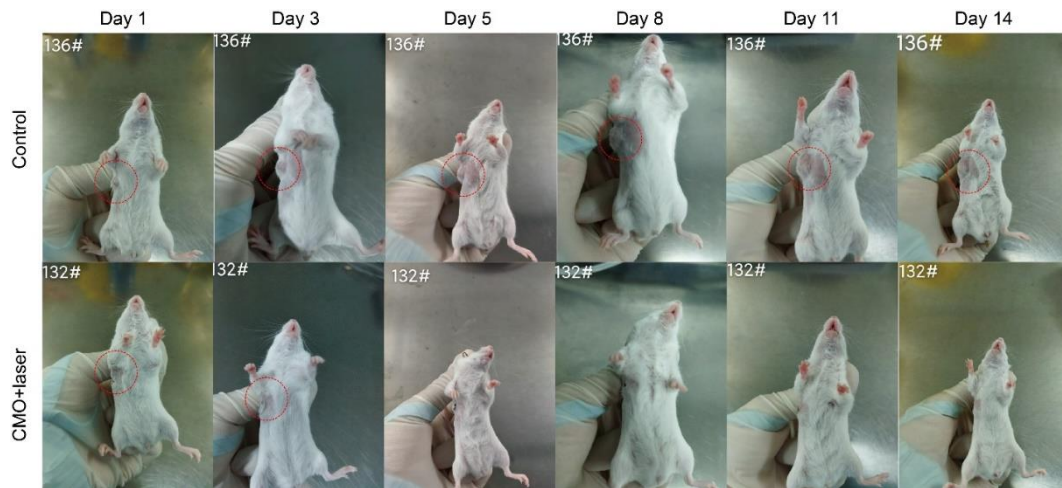

**Figure S13.** Photographs of 4T1 tumor-bearing mice and their tumor regions after 14 days without and with laser treatments.

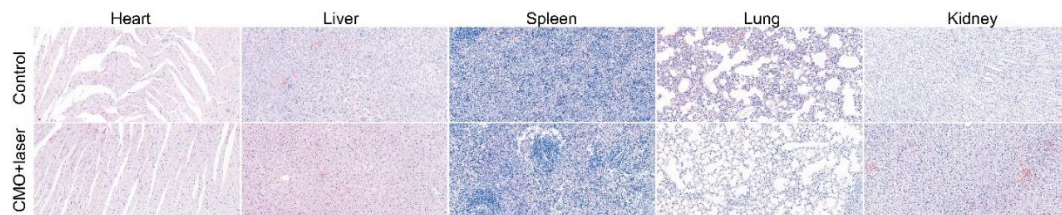

**Figure S14.** H&E-stained with major organs after 14 days for the Group I and VI mice.

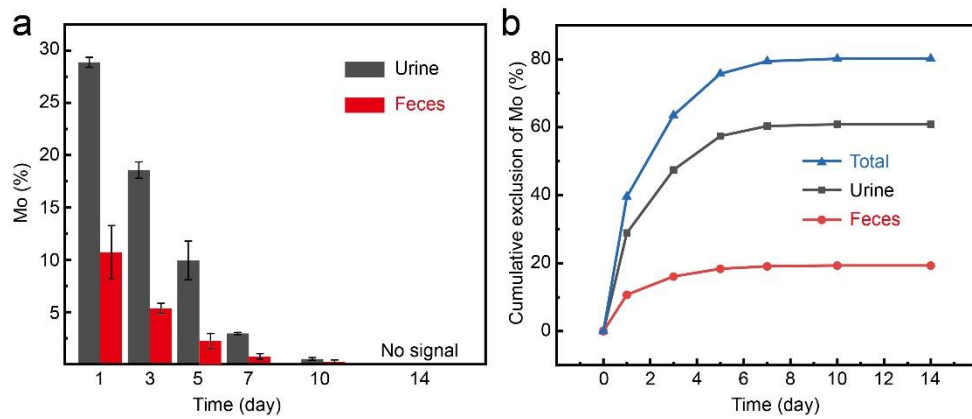

**Figure S15.** Metabolic study of CMO NPs. a) Mo% in urine and feces collected at various time points after injection and b) Cumulative exclusion of Mo%.
